# Supplementary material for: Combined immune-peptide nanofiber with HSP70/AKT/mTOR axis blockade enhances near-infrared photoimmunotherapy, inhibiting tumor growth and recurrence
Source: Research Square preprint supplement (doi:10.21203/rs.3.rs-5827209/v1), 2025-01-28
Supplement: Supplementary file 2 [file 621756c8ff92bce579248875.pdf]

## Lasing Reporting Summary

Nature Research wishes to improve the reproducibility of the work that we publish. This form is intended for publication with all accepted papers reporting claims of lasing and provides structure for consistency and transparency in reporting. Some list items might not apply to an individual manuscript, but all fields must be completed for clarity.

For further information on Nature Research policies, including our [data availability policy](#), see [Authors & Referees](#).

### ► Experimental design

#### Please check: are the following details reported in the manuscript?

##### 1. Threshold

Plots of device output power versus pump power over a wide range of values indicating a clear threshold

☐ Yes  
☒ No

The 808 nm homogenized fiber-coupled laser (MW-GX-808/2000mW) utilized in this study is commercially available, with its performance specifications readily accessible on the manufacturer's website. Therefore, a more detailed description is omitted in the manuscript.

##### 2. Linewidth narrowing

Plots of spectral power density for the emission at pump powers below, around, and above the lasing threshold, indicating a clear linewidth narrowing at threshold

☐ Yes  
☒ No

The 808 nm homogenized fiber-coupled laser (MW-GX-808/2000mW) utilized in this study is commercially available, with its performance specifications readily accessible on the manufacturer's website. Therefore, a more detailed description is omitted in the manuscript.

Resolution of the spectrometer used to make spectral measurements

☐ Yes  
☒ No

The 808 nm homogenized fiber-coupled laser (MW-GX-808/2000mW) utilized in this study is commercially available, with its performance specifications readily accessible on the manufacturer's website. Therefore, a more detailed description is omitted in the manuscript.

##### 3. Coherent emission

Measurements of the coherence and/or polarization of the emission

☐ Yes  
☒ No

The study did not involve this aspect.

##### 4. Beam spatial profile

Image and/or measurement of the spatial shape and profile of the emission, showing a well-defined beam above threshold

☐ Yes  
☒ No

The 808 nm homogenized fiber-coupled laser (MW-GX-808/2000mW) utilized in this study is commercially available, with its performance specifications readily accessible on the manufacturer's website. Therefore, a more detailed description is omitted in the manuscript.

##### 5. Operating conditions

Description of the laser and pumping conditions  
*Continuous-wave, pulsed, temperature of operation*

☐ Yes  
☒ No

The 808 nm homogenized fiber-coupled laser (MW-GX-808/2000mW) utilized in this study is commercially available, with its performance specifications readily accessible on the manufacturer's website. Therefore, a more detailed description is omitted in the manuscript.

Threshold values provided as density values (e.g.  $\text{W cm}^{-2}$  or  $\text{J cm}^{-2}$ ) taking into account the area of the device

☐ Yes  
☒ No

The 808 nm homogenized fiber-coupled laser (MW-GX-808/2000mW) utilized in this study is commercially available, with its performance specifications readily accessible on the manufacturer's website. Therefore, a more detailed description is omitted in the manuscript.

##### 6. Alternative explanations

Reasoning as to why alternative explanations have been ruled out as responsible for the emission characteristics  
*e.g. amplified spontaneous, directional scattering; modification of fluorescence spectrum by the cavity*

☐ Yes  
☒ No

The study did not involve this aspect.

##### 7. Theoretical analysis

Theoretical analysis that ensures that the experimental values measured are realistic and reasonable  
*e.g. laser threshold, linewidth, cavity gain-loss, efficiency*

☐ Yes  
☒ No

The study did not involve this aspect.

##### 8. Statistics

Number of devices fabricated and tested

- ☐ Yes
- ☒ No

The study did not involve this aspect.

Statistical analysis of the device performance and lifetime (time to failure)

- ☐ Yes
- ☒ No

The 808 nm homogenized fiber-coupled laser (MW-GX-808/2000mW) utilized in this study is commercially available, with its performance specifications readily accessible on the manufacturer's website. Therefore, a more detailed description is omitted in the manuscript.
